# Supplementary material
Source: HighWire-hosted journal article supplement (https://cmaj.ca/highwire/filestream/76571/field_highwire_adjunct_files/1/191297-res-2-at.pdf)
Supplement: 191297-res-2-at.pdf [file 191297-res-2-at.pdf]

**Appendix 2 (as supplied by the authors): Health conditions**

**Table A2-1.** CIHI Population Grouping Methodology Health Condition List

| <b>Health Condition</b>                                                                | <b>Classification</b> |
|----------------------------------------------------------------------------------------|-----------------------|
| A10 - Other Cerebral and Spinal Disease/Disorder                                       | Major Acute           |
| A41 - Stroke                                                                           | Major Acute           |
| A44 - Intracranial Injury                                                              | Major Acute           |
| A45 - Skull Fracture                                                                   | Major Acute           |
| A47 - Infection/Inflammation Nervous System                                            | Major Acute           |
| A81 - Coma Unspecified                                                                 | Major Acute           |
| D01 - Pleural Disease (including Pleural Effusion)                                     | Major Acute           |
| D41 - Respiratory Failure                                                              | Major Acute           |
| E41 - Acute Myocardial Infarction/Shock/Arrest                                         | Major Acute           |
| E43 - Unstable Angina                                                                  | Major Acute           |
| F43 - Gastrointestinal Obstruction                                                     | Major Acute           |
| F45 - Peritoneal Disease (including Peritonitis)                                       | Major Acute           |
| H41 - Traumatic Amputation Arm/Hand/Leg/Foot                                           | Major Acute           |
| H42 - Fracture/Dislocation Vertebrae, Pelvis                                           | Major Acute           |
| H43 - Fracture Femur                                                                   | Major Acute           |
| H47 - Musculoskeletal Infections                                                       | Major Acute           |
| I41 - Serious Burn/Frostbite                                                           | Major Acute           |
| O01 - Disease of White Blood Cells (including Neutropenia)                             | Major Acute           |
| O04 - Spleen Disorder                                                                  | Major Acute           |
| P41 - Sepsis                                                                           | Major Acute           |
| Q81 - Delirium                                                                         | Major Acute           |
| S41 - Transplant Complication                                                          | Major Acute           |
| S42 - Orthopedic Complication                                                          | Major Acute           |
| S43 - Ostomy Complication                                                              | Major Acute           |
| S47 - Shock                                                                            | Major Acute           |
| S49 - Internal Trauma                                                                  | Major Acute           |
| A08 - Disorder of the Peripheral Nervous System (including Carpal Tunnel, Bells Palsy) | Moderate Acute        |
| A42 - Cerebrovascular Disorder (excl. Stroke)                                          | Moderate Acute        |
| A43 - Transient Ischemic Attack                                                        | Moderate Acute        |
| A82 - Seizure                                                                          | Moderate Acute        |
| F05 - Hernia                                                                           | Moderate Acute        |
| F42 - Unspecified Gastrointestinal Hemorrhage                                          | Moderate Acute        |
| F44 - Peptic Ulcer                                                                     | Moderate Acute        |
| F46 - Disease of Appendix                                                              | Moderate Acute        |
| G05 - Diseases of Gallbladder and Biliary Tract                                        | Moderate Acute        |
| J02 - Diabetes Mellitus                                                                | Moderate Acute        |
| J06 - Adrenal Disorder                                                                 | Moderate Acute        |
| J11 - Disorder of Electrolyte Acid Base Balance                                        | Moderate Acute        |
| J12 - Hypoglycemia                                                                     | Moderate Acute        |
| K41 - Acute/Other Kidney Disease/Failure                                               | Moderate Acute        |
| S46 - Other Complication of Medical or Surgical Care                                   | Moderate Acute        |

Appendix to: Weir S, Steffler M, Li Y, et al. Use of the Population Grouping Methodology of the Canadian Institute for Health Information to predict high-cost health system users in Ontario. *CMAJ* 2020. DOI:10.1503/cmaj.191297.

Copyright © 2020 The Author(s) or their employer(s).

To receive this resource in an accessible format, please contact us at [cmajgroup@cmaj.ca](mailto:cmajgroup@cmaj.ca).

| <b>Health Condition</b>                                                         | <b>Classification</b> |
|---------------------------------------------------------------------------------|-----------------------|
| A46 - Concussion                                                                | Minor Acute           |
| A48 - Nerve Injury                                                              | Minor Acute           |
| A83 - Migraine/Other Headache                                                   | Minor Acute           |
| A84 - Neurological, Sensory, Cognitive Signs and Symptoms                       | Minor Acute           |
| B04 - Disorder of the Eyelids and Lacrimal System                               | Minor Acute           |
| B41 - Retinal Break/Detachment                                                  | Minor Acute           |
| B42 - Infection/Inflammation Eye                                                | Minor Acute           |
| B43 - Injury of Eye and Periocular Area                                         | Minor Acute           |
| C02 - Disease of Oral Cavity, Salivary Gland, or Jaw                            | Minor Acute           |
| C03 - Dental Caries/Gingivitis                                                  | Minor Acute           |
| C04 - Chronic Upper Respiratory Condition (including Tonsillitis)               | Minor Acute           |
| C06 - Disorder of External Ear                                                  | Minor Acute           |
| C07 - Other Disease Middle/Inner Ear and Mastoid                                | Minor Acute           |
| C08 - Meniere's/Dizziness/Vertigo                                               | Minor Acute           |
| C41 - Otitis Media                                                              | Minor Acute           |
| C42 - Acute ENT, Upper Respiratory Condition (including Benign Neoplasm, Croup) | Minor Acute           |
| D42 - Pneumonia                                                                 | Minor Acute           |
| D43 - Acute Infectious/Parasitic Respiratory Disease (excl. Pneumonia)          | Minor Acute           |
| D44 - Acute and Other Respiratory Diseases and Disorders                        | Minor Acute           |
| D81 - Signs, Symptoms Respiratory System                                        | Minor Acute           |
| E08 - Uncomplicated Varicose Veins                                              | Minor Acute           |
| E82 - Signs, Symptoms Cardiovascular System                                     | Minor Acute           |
| F02 - Gastroesophageal Reflux Disease                                           | Minor Acute           |
| F07 - Vascular Disorder of Intestine (including Ischemic Bowel)                 | Minor Acute           |
| F09 - Hemorrhoids                                                               | Minor Acute           |
| F10 - Benign Neoplasm/Polyp Colon, Rectum, Anus                                 | Minor Acute           |
| F11 - Other Rectal/Anal Disorder                                                | Minor Acute           |
| F12 - Other Disease/Disorder of the Digestive System                            | Minor Acute           |
| F41 - Acute Gastrointestinal Infection                                          | Minor Acute           |
| F81 - Signs, Symptoms Digestive and Hepatobiliary System                        | Minor Acute           |
| F82 - Abdominal Pain                                                            | Minor Acute           |
| G04 - Acute Liver Disease and Other Hepatic Disorders                           | Minor Acute           |
| H03 - Crystal Arthropathy (including Gout)                                      | Minor Acute           |
| H05 - Other Bone Disease                                                        | Minor Acute           |
| H44 - Other Fracture/Dislocation                                                | Minor Acute           |
| H45 - Benign/Unspecified Musculoskeletal Neoplasm                               | Minor Acute           |
| H46 - Joint/Tendon Disorder and Injury (including Pain, Sprain, Strain)         | Minor Acute           |
| H81 - Neuromuscular Signs and Symptoms                                          | Minor Acute           |
| H82 - Back Pain                                                                 | Minor Acute           |
| I03 - Eczema/Dermatitis/Hives                                                   | Minor Acute           |
| I04 - Acne/Rosacea                                                              | Minor Acute           |
| I06 - Benign Skin Neoplasm                                                      | Minor Acute           |
| I07 - Benign Disorder of Breast                                                 | Minor Acute           |

| <b>Health Condition</b>                                                      | <b>Classification</b> |
|------------------------------------------------------------------------------|-----------------------|
| I08 - Disease of Hair/Nail/Sweat Glands                                      | Minor Acute           |
| I09 - Other Condition of Skin/Subcutaneous Tissue                            | Minor Acute           |
| I42 - Skin Infection (including Cellulitis)                                  | Minor Acute           |
| I43 - Superficial Skin Injury/Contusion/Non-Serious Burn                     | Minor Acute           |
| I81 - Signs, Symptoms Skin                                                   | Minor Acute           |
| K02 - Benign/Unspecified Urinary Neoplasm                                    | Minor Acute           |
| K42 - Urinary Tract Infection/Cystitis                                       | Minor Acute           |
| K43 - Urinary Obstruction and Retention                                      | Minor Acute           |
| K81 - Signs, Symptoms Urinary                                                | Minor Acute           |
| L03 - Congenital/Other Female Reproductive Condition                         | Minor Acute           |
| M42 - Unsuccessful/Ectopic Pregnancy                                         | Minor Acute           |
| O05 - Lymphatic System Disorder (excl. Spleen)                               | Minor Acute           |
| P03 - Sexually Transmitted Disease (excl. HIV)                               | Minor Acute           |
| P42 - Influenza                                                              | Minor Acute           |
| P43 - Other Viral Infection                                                  | Minor Acute           |
| P44 - Other Bacterial Infection                                              | Minor Acute           |
| P45 - Other and Unspecified Infection                                        | Minor Acute           |
| S44 - Poisoning/Adverse Effects                                              | Minor Acute           |
| S45 - Other Trauma/Injury (Not Elsewhere Classified)                         | Minor Acute           |
| S48 - Open Wound                                                             | Minor Acute           |
| S50 - Reaction to Transfusion, Medication or Anaesthesia                     | Minor Acute           |
| S81 - General Signs, Symptoms (Not Elsewhere Classified)                     | Minor Acute           |
| A01 - Congenital Malformation of the Nervous System (including Spina Bifida) | Major Chronic         |
| A02 - Hereditary/Degenerative Condition of the Nervous System                | Major Chronic         |
| A03 - Muscular Dystrophy and Other Myopathy                                  | Major Chronic         |
| A04 - Parkinson's Disease/Parkinsonism                                       | Major Chronic         |
| A06 - Cerebral Palsy                                                         | Major Chronic         |
| A07 - Paralytic Syndrome/Spinal Cord Injury                                  | Major Chronic         |
| A11 - Other Disease of the Nervous System                                    | Major Chronic         |
| D02 - Congenital Disorder of the Respiratory System                          | Major Chronic         |
| D04 - Pulmonary Hypertension                                                 | Major Chronic         |
| E01 - Heart Failure                                                          | Major Chronic         |
| E02 - Malformation of the Cardiovascular System                              | Major Chronic         |
| E03 - Cardiac Valve Disease                                                  | Major Chronic         |
| E07 - Peripheral Venous Disease/Phlebitis/Thrombophlebitis/DVT               | Major Chronic         |
| E09 - Other Vascular System Disease                                          | Major Chronic         |
| E11 - Aortic Aneurysm                                                        | Major Chronic         |
| E12 - Peripheral Artery Disease                                              | Major Chronic         |
| F01 - Congenital Malformation of the Digestive and Hepatobiliary System      | Major Chronic         |
| G01 - Cirrhosis                                                              | Major Chronic         |
| G03 - Pancreatic Disease                                                     | Major Chronic         |
| I01 - Autoimmune Skin Disorder                                               | Major Chronic         |
| I05 - Skin Ulcer (including Decubitus)                                       | Major Chronic         |

| <b>Health Condition</b>                                                         | <b>Classification</b> |
|---------------------------------------------------------------------------------|-----------------------|
| J01 - Cystic Fibrosis                                                           | Major Chronic         |
| K01 - Chronic Kidney Disease/Failure                                            | Major Chronic         |
| S03 - Transplant Recipient                                                      | Major Chronic         |
| S04 - Presence of Ostomy                                                        | Major Chronic         |
| A05 - Multiple Sclerosis and Other Demyelinating Disease of CNS                 | Moderate Chronic      |
| A09 - Epilepsy                                                                  | Moderate Chronic      |
| B01 - Cataract/Lens Disorder                                                    | Moderate Chronic      |
| B02 - Retinopathy                                                               | Moderate Chronic      |
| C01 - Congenital/Acquired Malformation of Ear/Nose/Throat                       | Moderate Chronic      |
| C05 - Hearing Loss (including Deafness)                                         | Moderate Chronic      |
| D03 - Chronic Obstructive Pulmonary Disease                                     | Moderate Chronic      |
| D05 - Other Chronic Lung Disease                                                | Moderate Chronic      |
| E04 - Coronary Artery Disease                                                   | Moderate Chronic      |
| E05 - Arrhythmia                                                                | Moderate Chronic      |
| E06 - Other Heart Disease                                                       | Moderate Chronic      |
| F06 - Inflammatory Bowel (including Crohn's, Ulcerative Colitis)                | Moderate Chronic      |
| G02 - Chronic Liver Disease (including Hepatitis)                               | Moderate Chronic      |
| H01 - Rheumatoid and Other Inflammatory Arthropathy (excl. Gout)                | Moderate Chronic      |
| H02 - Osteoarthritis                                                            | Moderate Chronic      |
| H04 - Osteoporosis                                                              | Moderate Chronic      |
| H07 - Systemic Connective Tissue Disorder (including Lupus, Scleroderma)        | Moderate Chronic      |
| H10 - Other Musculoskeletal and Connective Tissue Condition                     | Moderate Chronic      |
| I02 - Papulosquamous Disorder/Psoriasis                                         | Moderate Chronic      |
| J03 - Goitre                                                                    | Moderate Chronic      |
| J04 - Hyperthyroidism                                                           | Moderate Chronic      |
| K04 - Other Disease of the Urinary System                                       | Moderate Chronic      |
| K07 - Urinary Incontinence (Stress)                                             | Moderate Chronic      |
| L01 - Female Infertility                                                        | Moderate Chronic      |
| L04 - Endometriosis/Pelvic Inflammatory Disease                                 | Moderate Chronic      |
| L05 - Other Uterine, Fallopian, Ovarian Condition (including Prolapse, Fistula) | Moderate Chronic      |
| O02 - Anemia Disorder (excl. Nutritional)                                       | Moderate Chronic      |
| O03 - Coagulation and Hemorrhagic Disorder                                      | Moderate Chronic      |
| O06 - Disorder of Immune Mechanism                                              | Moderate Chronic      |
| P01 - Human Immunodeficiency Virus (HIV) Infection                              | Moderate Chronic      |
| P02 - Tuberculosis Disease                                                      | Moderate Chronic      |
| S02 - Chromosomal/Other/Unspecified Congenital Syndrome/Disorder                | Moderate Chronic      |
| B03 - Strabismus                                                                | Minor Chronic         |
| B05 - Vision Impairment (including Blindness)                                   | Minor Chronic         |
| B06 - Glaucoma                                                                  | Minor Chronic         |
| B07 - Other Eye Diseases and Disorders                                          | Minor Chronic         |
| D06 - Asthma                                                                    | Minor Chronic         |
| E10 - Hypertension                                                              | Minor Chronic         |
| F03 - Other Disease of the Esophagus                                            | Minor Chronic         |

| <b>Health Condition</b>                                                    | <b>Classification</b> |
|----------------------------------------------------------------------------|-----------------------|
| F04 - Gastritis and Duodenitis                                             | Minor Chronic         |
| F08 - Diverticulitis                                                       | Minor Chronic         |
| H06 - Vertebral/Disk and Other Disease of Back                             | Minor Chronic         |
| H08 - Musculoskeletal Malformation (excl. Spine)                           | Minor Chronic         |
| H09 - Myositis and Soft Tissue Disorder (including Muscle Inflammation)    | Minor Chronic         |
| J05 - Hypothyroidism                                                       | Minor Chronic         |
| J07 - Other Disease of the Endocrine System                                | Minor Chronic         |
| J08 - Malnutrition and Vitamin Deficiency                                  | Minor Chronic         |
| J09 - Hypercholesterolaemia and other Dyslipidemia                         | Minor Chronic         |
| J10 - Obesity                                                              | Minor Chronic         |
| J13 - Other Disorders of Metabolism                                        | Minor Chronic         |
| K03 - Other Disease/Disorder Bladder and Urethra                           | Minor Chronic         |
| K05 - Prostate Disorder                                                    | Minor Chronic         |
| K06 - Other Disease of the Male Reproductive System                        | Minor Chronic         |
| L02 - Menstruation Disorder (including Menopause)                          | Minor Chronic         |
| O07 - Other Disease of Blood and Blood Forming Organs                      | Minor Chronic         |
| Q01 - Dementia (including Alzheimer's)                                     | Major Mental Health   |
| Q02 - Delusional Disorder (including Schizophrenia)                        | Major Mental Health   |
| Q03 - Mental Disorder Resulting from Brain Injury or Other Illness         | Major Mental Health   |
| Q05 - Bipolar/Manic Mood Disorder                                          | Major Mental Health   |
| Q08 - Eating Disorder                                                      | Major Mental Health   |
| Q09 - Intellectual Disorder/Delay                                          | Major Mental Health   |
| Q04 - Depression                                                           | Other Mental Health   |
| Q06 - Personality Disorder                                                 | Other Mental Health   |
| Q07 - Drug/Alcohol Abuse/Dependence                                        | Other Mental Health   |
| Q10 - Developmental Disorder (including Autism Spectrum)                   | Other Mental Health   |
| Q11 - Neurotic/Anxiety/Obsessive Compulsive Disorder                       | Other Mental Health   |
| Q12 - Adjustment Reaction/Stress                                           | Other Mental Health   |
| Q13 - Emotional and Behavioural Disorder with Onset Generally in Childhood | Other Mental Health   |
| Q14 - Other/Unspecified Mental Disorder/Condition                          | Other Mental Health   |
| Q82 - Mental Health Signs and Symptoms                                     | Other Mental Health   |
| R01A - Brain Cancer                                                        | Major Cancer          |
| R02C - Oral/Ear/Nose/Throat Cancer                                         | Major Cancer          |
| R03D - Lung Cancer                                                         | Major Cancer          |
| R04F - Colorectal Cancer                                                   | Major Cancer          |
| R05F - Other Digestive and Hepatobiliary Cancer                            | Major Cancer          |
| R06H - Musculoskeletal Cancer                                              | Major Cancer          |
| R07K - Renal Cancer                                                        | Major Cancer          |
| R12K - Bladder Cancer                                                      | Major Cancer          |
| R13L - Ovarian Cancer                                                      | Major Cancer          |
| R14L - Uterine Cancer                                                      | Major Cancer          |
| R16O - Leukemia/Lymphoma                                                   | Major Cancer          |
| R18 - Metastatic Cancer                                                    | Major Cancer          |

| Health Condition                               | Classification  |
|------------------------------------------------|-----------------|
| R08I - Breast Cancer                           | Other Cancer    |
| R09I - Skin Cancer                             | Other Cancer    |
| R10J - Thyroid Cancer                          | Other Cancer    |
| R11K - Prostate Cancer                         | Other Cancer    |
| R15L - Cervical Cancer                         | Other Cancer    |
| R17 - Other and Unspecified Primary Cancer     | Other Cancer    |
| M41 - Antepartum Condition                     | Obstetrics      |
| M43 - Completed Pregnancy                      | Obstetrics      |
| N44 - Healthy Newborn                          | Healthy Newborn |
| N41 - Extremely Low Birth Weight or Immaturity | Major Newborn   |
| N42 - Serious Perinatal Condition              | Major Newborn   |
| N43 - Complicated Neonatal Condition           | Major Newborn   |
| S01 - Palliative State                         | Palliative      |

**Source:** Adapted from Canadian Institute for Health Information. CIHI's Population Grouping Methodology 1.1 (compiled code): Methodology Report. Ottawa: CIHI; April 2017; Appendix A. Shading indicates the various groupings, according to the classification shown in the second column.

**Table A2-2.** 85 Chronic Conditions defined from subset of Health Conditions

| Chronic Condition by Category                                                                                                                                                          | Health Condition(s)                                                                                                    |
|----------------------------------------------------------------------------------------------------------------------------------------------------------------------------------------|------------------------------------------------------------------------------------------------------------------------|
| <b>Major Chronic</b>                                                                                                                                                                   |                                                                                                                        |
| 1. Paralytic Syndrome (with or without Stroke)                                                                                                                                         | A07                                                                                                                    |
| 2. Congenital Malformation of the Nervous System (including Spina Bifida)                                                                                                              | A01                                                                                                                    |
| 3. Parkinson's Disease/Parkinsonism                                                                                                                                                    | A04                                                                                                                    |
| 4. Cerebral Palsy                                                                                                                                                                      | A06                                                                                                                    |
| 5. Major Chronic Nervous System                                                                                                                                                        | A02, A03, A11                                                                                                          |
| 6. Pulmonary Hypertension                                                                                                                                                              | D04                                                                                                                    |
| 7. Heart Disease (including Heart Failure without AMI, respiratory failure or CAD/Heart Failure with CAD or Arrhythmia/AMI with Heart Failure/CAD or Arrhythmia without Heart Failure) | E01 (and not E41/D41/E04), E01+E41, E04+E01, E05+E01, E06+E01, E04 (and not E01), E05 (and not E01), E06 (and not E01) |
| 8. Cardiac Valve Disease                                                                                                                                                               | E03                                                                                                                    |
| 9. PVD/Other Chronic Vascular Dx (without Diabetes Mellitus/Hypoglycemia)                                                                                                              | E07, E09, E11, E12 (and not J02/J12)                                                                                   |
| 10. Chronic Kidney Disease/Failure (without Diabetes Mellitus/Hypoglycemia)                                                                                                            | K01 (and not J02/J12)                                                                                                  |
| 11. Diabetes/Hypoglycemia with PVD/Other Chronic Vascular Disease/Chronic Kidney Disease/Kidney Failure                                                                                | J02+E07, J02+E09, J02+E11, J02+E12, J12+E07, J12+E09, J12+E11, J12+E12, J02+K01, J12+K01                               |
| 12. Pancreatic Disease                                                                                                                                                                 | G03                                                                                                                    |
| 13. Cirrhosis                                                                                                                                                                          | G01                                                                                                                    |
| 14. Skin Ulcer (including Decubitus)                                                                                                                                                   | I05                                                                                                                    |
| 15. Cystic Fibrosis                                                                                                                                                                    | J01                                                                                                                    |
| 16. Presence of Ostomy                                                                                                                                                                 | S04                                                                                                                    |

|                                                                                            |                                          |
|--------------------------------------------------------------------------------------------|------------------------------------------|
| 17. Transplant Recipient                                                                   | S03                                      |
| 18. Other Major Chronic: Congenital Disorder of the Respiratory System                     | D02                                      |
| 19. Other Major Chronic: Malformation of the Cardiovascular System                         | E02                                      |
| 20. Other Major Chronic: Congenital Malformation of the Digestive and Hepatobiliary System | F01                                      |
| 21. Other Major Chronic: Autoimmune Skin Disorder                                          | I01                                      |
| <b>Moderate Chronic</b>                                                                    |                                          |
| 22. Epilepsy                                                                               | A09                                      |
| 23. Multiple Sclerosis and Other Demyelinating Disease of CNS                              | A05                                      |
| 24. Retinopathy                                                                            | B02                                      |
| 25. Cataract/Lens Disorder                                                                 | B01                                      |
| 26. COPD without pneumonia                                                                 | D03, D05 (and not D42)                   |
| 27. Inflammatory Bowel (including Crohn's, Ulcerative Colitis)                             | F06                                      |
| 28. Chronic Liver Disease (including Hepatitis)                                            | G02                                      |
| 29. Rheumatoid/Osteoarthritis and Other Inflammatory Arthropathy (excluding Gout)          | H01, H02 (and not H03)                   |
| 30. Osteoporosis                                                                           | H04                                      |
| 31. Systemic Connective Tissue Disorder (including Lupus/Scleroderma)                      | H07                                      |
| 32. Urinary Incontinence (Stress)                                                          | K07                                      |
| 33. Endometriosis/Pelvic Inflammatory Disease                                              | L04                                      |
| 34. Female Infertility                                                                     | L01                                      |
| 35. Other Uterine, Fallopian, Ovarian Condition (including Prolapse, Fistula)              | L05                                      |
| 36. Major Chronic Blood Disorder (including Coagulation Disorders, Anemia)                 | O02, O03                                 |
| 37. Human Immunodeficiency Virus (HIV) Infection                                           | P01                                      |
| 38. Chromosomal/Other/Unspecified Congenital Syndrome/Disorder                             | S02                                      |
| 39. Other Moderate Chronic: Congenital/Acquired Malformation of Ear/Nose/Throat            | C01                                      |
| 40. Other Moderate Chronic: Hearing Loss (including Deafness)                              | C05                                      |
| 41. Other Moderate Chronic: Other Musculoskeletal and Connective Tissue Condition          | H10                                      |
| 42. Other Moderate Chronic: Papulosquamous Disorder/Psoriasis                              | I02                                      |
| 43. Other Moderate Chronic: Goitre                                                         | J03                                      |
| 44. Other Moderate Chronic: Hyperthyroidism                                                | J04                                      |
| 45. Other Moderate Chronic: Other Disease of the Urinary System                            | K04                                      |
| 46. Other Moderate Chronic: Disorder of Immune Mechanism                                   | O06                                      |
| 47. Other Moderate Chronic: Tuberculosis Disease                                           | P02                                      |
| 48. Diabetes without major comorbidities                                                   | J02, J12 (excluding major comorbidities) |
| <b>Minor Chronic</b>                                                                       |                                          |
| 49. Other Eye Diseases and Disorders                                                       | B07                                      |
| 50. Chronic Vision Impairment                                                              | B03, B05, B06                            |
| 51. Asthma                                                                                 | D06                                      |
| 52. Hypertension                                                                           | E10                                      |
| 53. Other Disease of the Esophagus (including esophagitis)                                 | F03                                      |
| 54. Diverticulitis                                                                         | F08                                      |

|                                                                                                                                                                                                                                                                                                  |                                                                                                                |
|--------------------------------------------------------------------------------------------------------------------------------------------------------------------------------------------------------------------------------------------------------------------------------------------------|----------------------------------------------------------------------------------------------------------------|
| 55. Gastritis and Duodenitis                                                                                                                                                                                                                                                                     | F04                                                                                                            |
| 56. Musculoskeletal Malformation (excluding Spine)                                                                                                                                                                                                                                               | H08                                                                                                            |
| 57. Vertebral/Disk and Other Disease of Back                                                                                                                                                                                                                                                     | H06                                                                                                            |
| 58. Myositis and Soft Tissue Disorder (including Muscle Inflammation)                                                                                                                                                                                                                            | H09                                                                                                            |
| 59. Other Disease of the Endocrine System                                                                                                                                                                                                                                                        | J07                                                                                                            |
| 60. Other Disorders of Metabolism                                                                                                                                                                                                                                                                | J13                                                                                                            |
| 61. Malnutrition and Vitamin Deficiency                                                                                                                                                                                                                                                          | J08                                                                                                            |
| 62. Hypothyroidism                                                                                                                                                                                                                                                                               | J05                                                                                                            |
| 63. Obesity                                                                                                                                                                                                                                                                                      | J10                                                                                                            |
| 64. Hypercholesterolaemia and Other Dyslipidemia                                                                                                                                                                                                                                                 | J09                                                                                                            |
| 65. Prostate Disorder                                                                                                                                                                                                                                                                            | K05                                                                                                            |
| 66. Other Disease of the Male Reproductive System                                                                                                                                                                                                                                                | K06                                                                                                            |
| 67. Other Disease/Disorder of the Bladder and Urethra                                                                                                                                                                                                                                            | K03                                                                                                            |
| 68. Menstruation Disorder (including Menopause)                                                                                                                                                                                                                                                  | L02                                                                                                            |
| 69. Other Disease of Blood and Blood Forming Organs                                                                                                                                                                                                                                              | O07                                                                                                            |
| <b>Major Mental Health</b>                                                                                                                                                                                                                                                                       |                                                                                                                |
| 70. Mental Disorder Resulting from Brain Injury or Other Illness                                                                                                                                                                                                                                 | Q03                                                                                                            |
| 71. Eating Disorder                                                                                                                                                                                                                                                                              | Q08                                                                                                            |
| 72. Dementia (including Alzheimer's)                                                                                                                                                                                                                                                             | Q01                                                                                                            |
| 73. Delusional Disorder (including Schizophrenia)                                                                                                                                                                                                                                                | Q02                                                                                                            |
| 74. Other Major Mental Health (including Bipolar Disorder):<br>Bipolar/Manic Mood Disorder                                                                                                                                                                                                       | Q05                                                                                                            |
| 75. Other Major Mental Health (including Bipolar Disorder): Intellectual<br>Disorder/Delay                                                                                                                                                                                                       | Q09                                                                                                            |
| <b>Minor Mental Health</b>                                                                                                                                                                                                                                                                       |                                                                                                                |
| 76. Personality Disorder                                                                                                                                                                                                                                                                         | Q06                                                                                                            |
| 77. Drug/Alcohol Abuse/Dependence                                                                                                                                                                                                                                                                | Q07                                                                                                            |
| 78. Depression                                                                                                                                                                                                                                                                                   | Q04                                                                                                            |
| 79. Developmental Disorder (including Autism Spectrum)                                                                                                                                                                                                                                           | Q10                                                                                                            |
| 80. Neurotic/Anxiety/Obsessive Compulsive Disorder                                                                                                                                                                                                                                               | Q11                                                                                                            |
| 81. Behavioural and Emotional Childhood/Adolescent Disorder                                                                                                                                                                                                                                      | Q13                                                                                                            |
| 82. Other Mental Health (including adjustment reaction): Adjustment<br>Reaction/Stress                                                                                                                                                                                                           | Q12                                                                                                            |
| 83. Other Mental Health (including adjustment reaction):<br>Other/Unspecified Mental Disorder/Condition                                                                                                                                                                                          | Q14                                                                                                            |
| 84. Mental Health Signs and Symptoms                                                                                                                                                                                                                                                             | Q82                                                                                                            |
| <b>Cancer</b>                                                                                                                                                                                                                                                                                    |                                                                                                                |
| 85. Cancer, all types (including Brain, Oral/Ear/Nose/Throat, Lung,<br>Colorectal, Other Digestive/Hepatobiliary, Musculoskeletal, Renal,<br>Breast, Skin, Thyroid, Prostate, Bladder, Ovarian, Uterine, Cervical,<br>Leukemia/Lymphoma, Other/Unspecified Primary Cancer,<br>Metastatic Cancer) | R18, R01A, R05F, R03D, R16O, R13L,<br>R12K, R06H, R07K, R04F, R14L, R02C,<br>R08I, R11K, R09I, R10J, R15L, R17 |

**Source:** Adapted from Canadian Institute for Health Information. CIHI's Population Grouping Methodology 1.1 (compiled code): Methodology Report. Ottawa: CIHI; April 2017; Appendix C. Shading indicates the various groupings, according to the centred category headings.
